# Supplementary material
Source: publisher figshare collection journal article supplement (https://acs.figshare.com/ndownloader/files/17413154)
Supplement: Supplementary file 1 [file 17413154]

## Supporting Information

The Behavior of *E. Coli* with Variable Surface Morphology Changes on Charged Semiconductor Interfaces

*Divya Iyer, ‡ Alexey V. Gulyuk, † Pramod Reddy, & Ronny Kirste, & Ramon Collazo, † Dennis R. LaJeunesse, ‡\*  
Albena Ivanisevic†\**

†Department of Materials Science and Engineering, North Carolina State University, Raleigh, North Carolina, 27695, USA

‡ Department of Nanoscience, Joint School of Nanoscience and Nanoengineering, University of North Carolina-Greensboro, Greensboro, North Carolina, 27401, USA

& Adroit Materials, 2054 Kildaire Farm Rd., Suite 205, Cary, North Carolina 27518, USA

\*authors to whom correspondence should be addressed: [drlajeun@uncg.edu](mailto:drlajeun@uncg.edu), [ivanisevic@ncsu.edu](mailto:ivanisevic@ncsu.edu)

Figure S1. Representative KPFM scans of GaN samples under three conditions: no UV, UV on, UV off.

**No UV**

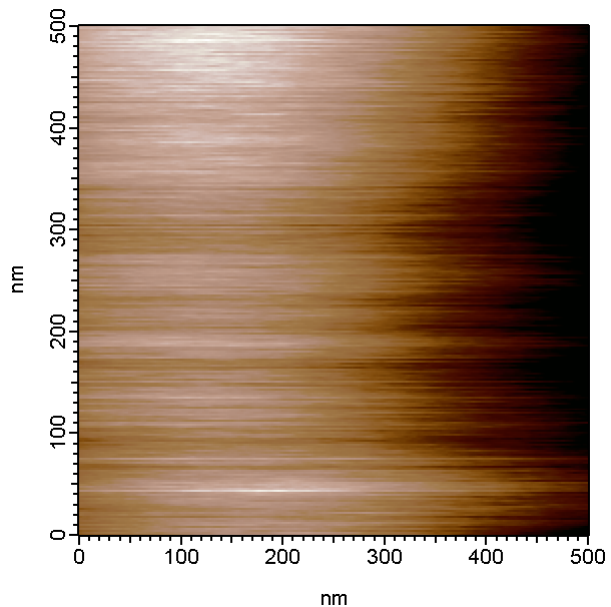

RMS charge:  
247.458 mV

**UV on**

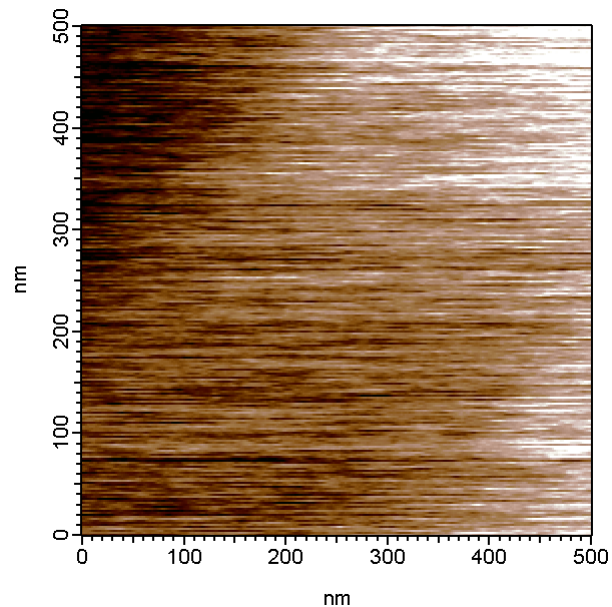

RMS charge:  
1.132 V

**UV off**

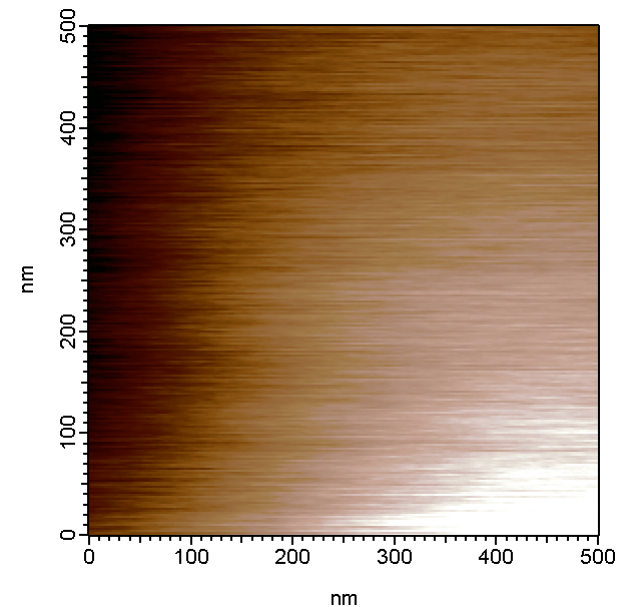

RMS charge:  
186.305 mV

Figure S2. Representative KPFM scans of GaN in the intermediate conditions – transferring from uncharged to charged and from charged to uncharged state.

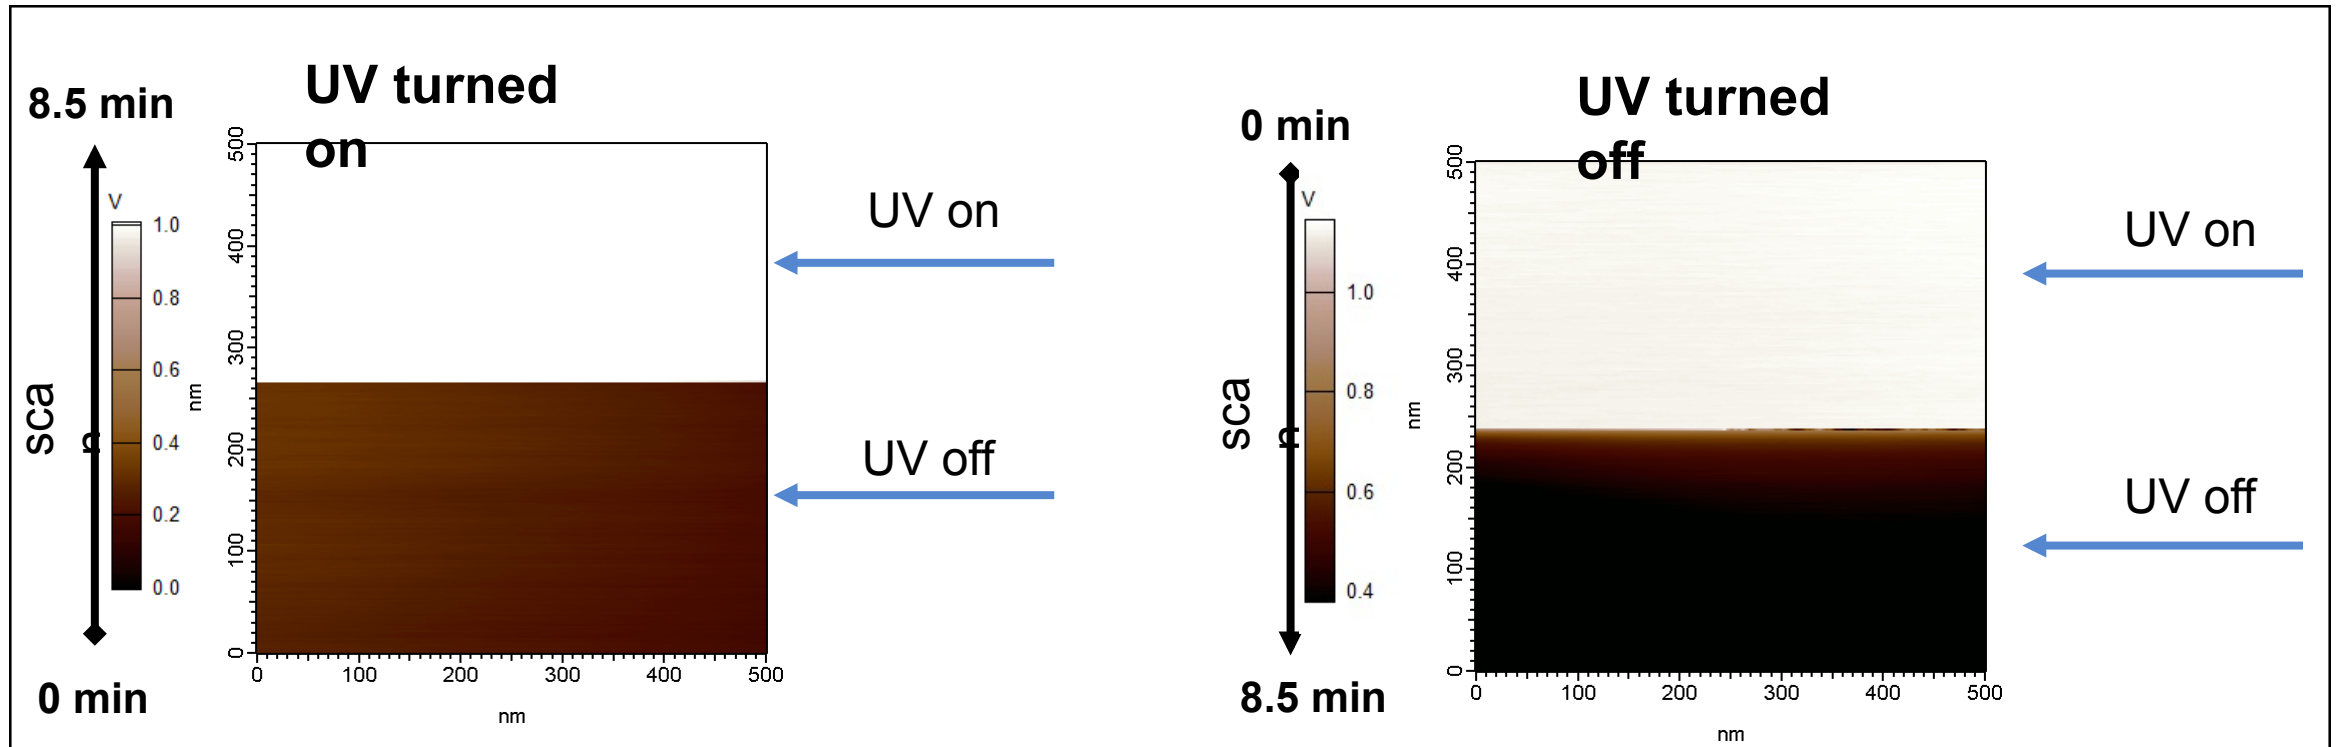

RMS charge:  
798.809 mV

RMS charge:  
855.125 mV
